# Supplementary material for: A biomass-derived dual crosslinked DNA-nanoparticle hydrogel for visible light-induced photodynamic bacterial inactivation
Source: Royal Society of Chemistry journal article supplement (doi:10.1039/d3sm01400b), 2023-01-01
Supplement: d3sm01400b1.pdf [file d3sm01400b1.pdf]

## **Biomass-derived dual crosslinked DNA-Nanoparticle hydrogel for visible light induced photodynamic bacterial inactivation**

Gourab Das, Suman Nayak, Dinesh Kumar Kotness and Prolay Das\*

Department of Chemistry, Indian Institute of Technology Patna,

Bihta, Patna, Bihar, 801106, India

\*Communicating author: [prolay@iitp.ac.in](mailto:prolay@iitp.ac.in), Tel: +91 6115 302 057

### **Supporting Information**

#### **Text S1: Instrumentations**

Powder XRD (pXRD) analysis of the DNA-NP was performed on an Empyrean, Malvern Panalytical device using a Cu-K ( $\lambda = 1.54 \text{ \AA}$ ) X-ray source at a scanning rate of  $2^\circ$  per minute and a voltage of 10 kV in the  $2\theta$  range of  $4^\circ$  to  $70^\circ$ . TEM images were captured using a JEM-F200 (Jeol, Japan) operating at 100 kV voltage with samples deposited on carbon-coated copper grid. Fourier transform–infrared spectroscopy (FTIR) experiments were performed with Parkin Elmer Spectrum-400 and a KBr pellet in the  $400\text{--}4000 \text{ cm}^{-1}$  range. Using a modular compact rheometer (Anton Paar, MCR 302, Austria) and a constant strain of 0.1% at room temperature, rheological tests of the hydrogel were conducted. Rheological measurements of the hydrogel were performed using a modular compact rheometer (Anton Paar, MCR 302, Austria) sweeping the frequency from 0.1 to 100 rad/s, at a constant strain of 0.1% at room temperature. UV-Visible absorption and steady-state fluorescence spectra were recorded using UV-2550 spectrophotometer (Shimadzu, Japan) and Fluoromax-400 spectrofluorometer (Horiba, Japan). Field emission scanning electron microscopy (FESEM) images were taken using a GeminiSEM 500 microscope (ZEISS) placing lyophilized samples on a carbon tap followed by coating with Au. The zeta potential and dynamic light scattering experiments were performed using an Anton Paar (Lightsizer 500) instrument. Digital images were obtained on a Canon D60 digital camera.

#### **Text S2: SEM sample preparation of bacteria**

Cells of *E. coli* strain MTCC 433 were harvested before and after photodynamic treatment for 1 h with 2 mg/ml DNA-NP. The cells were then collected by centrifugation at 5000 rpm for 5 min and washed twice with PBS followed by air drying. The 2.5 % glutaraldehyde was added and kept at  $4^\circ\text{C}$  for overnight for fixation on a silicon wafer ( $10 \times 10 \text{ mm}$ ). Then the fixed slides

were washed with PBS for one more time followed by dehydration using ethanol with increasing percentages i.e. 10, 30, 50, 70, 90% in step gradient for 15 min each (including adding ethanol) and air-drying for 15 min. After dehydration, the specimen in slides were gold-coated using standard procedure and visualized under Scanning Electron Microscope under 5 kV voltage.

### **Text S3: Determination of Quantum Yield of DNA-NP**

Quantum Yield was determined by using a solution of quinine sulphate (QY = 0.55) in 0.5 M as standard. Quantum yield was calculated using the following equation,

$$QY_x = QY_s \times (A_s/A_x) \times (I_x/I_s) \times (n_x^2/n_s^2)$$

Here, subscripts x and s stand for the sample and the reference material respectively, QY stands for the quantum yield; A refers to the absorbance at the excitation wavelength, I to the integrated fluorescence intensity and n to the refractive index of the solvent.

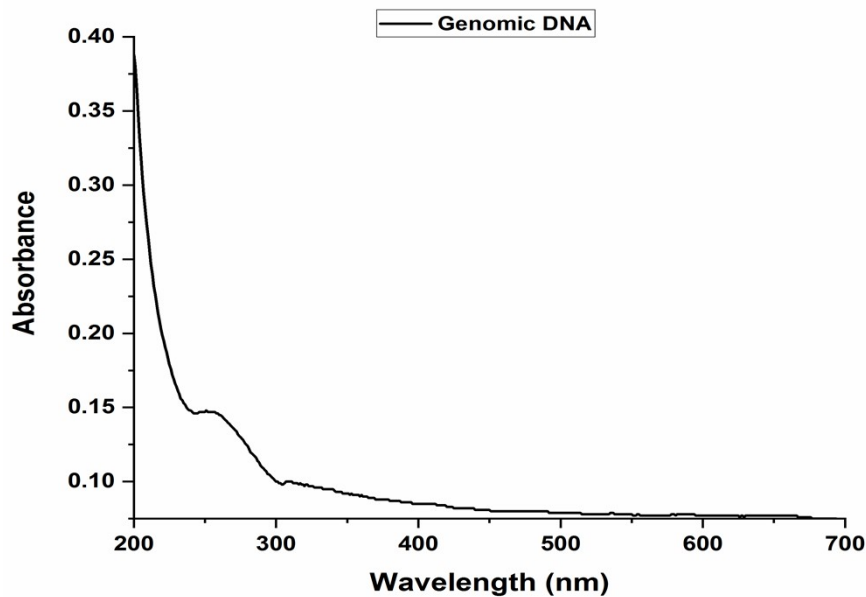

**Figure S1: UV-Vis Spectrum of biomass DNA extracted from onion**

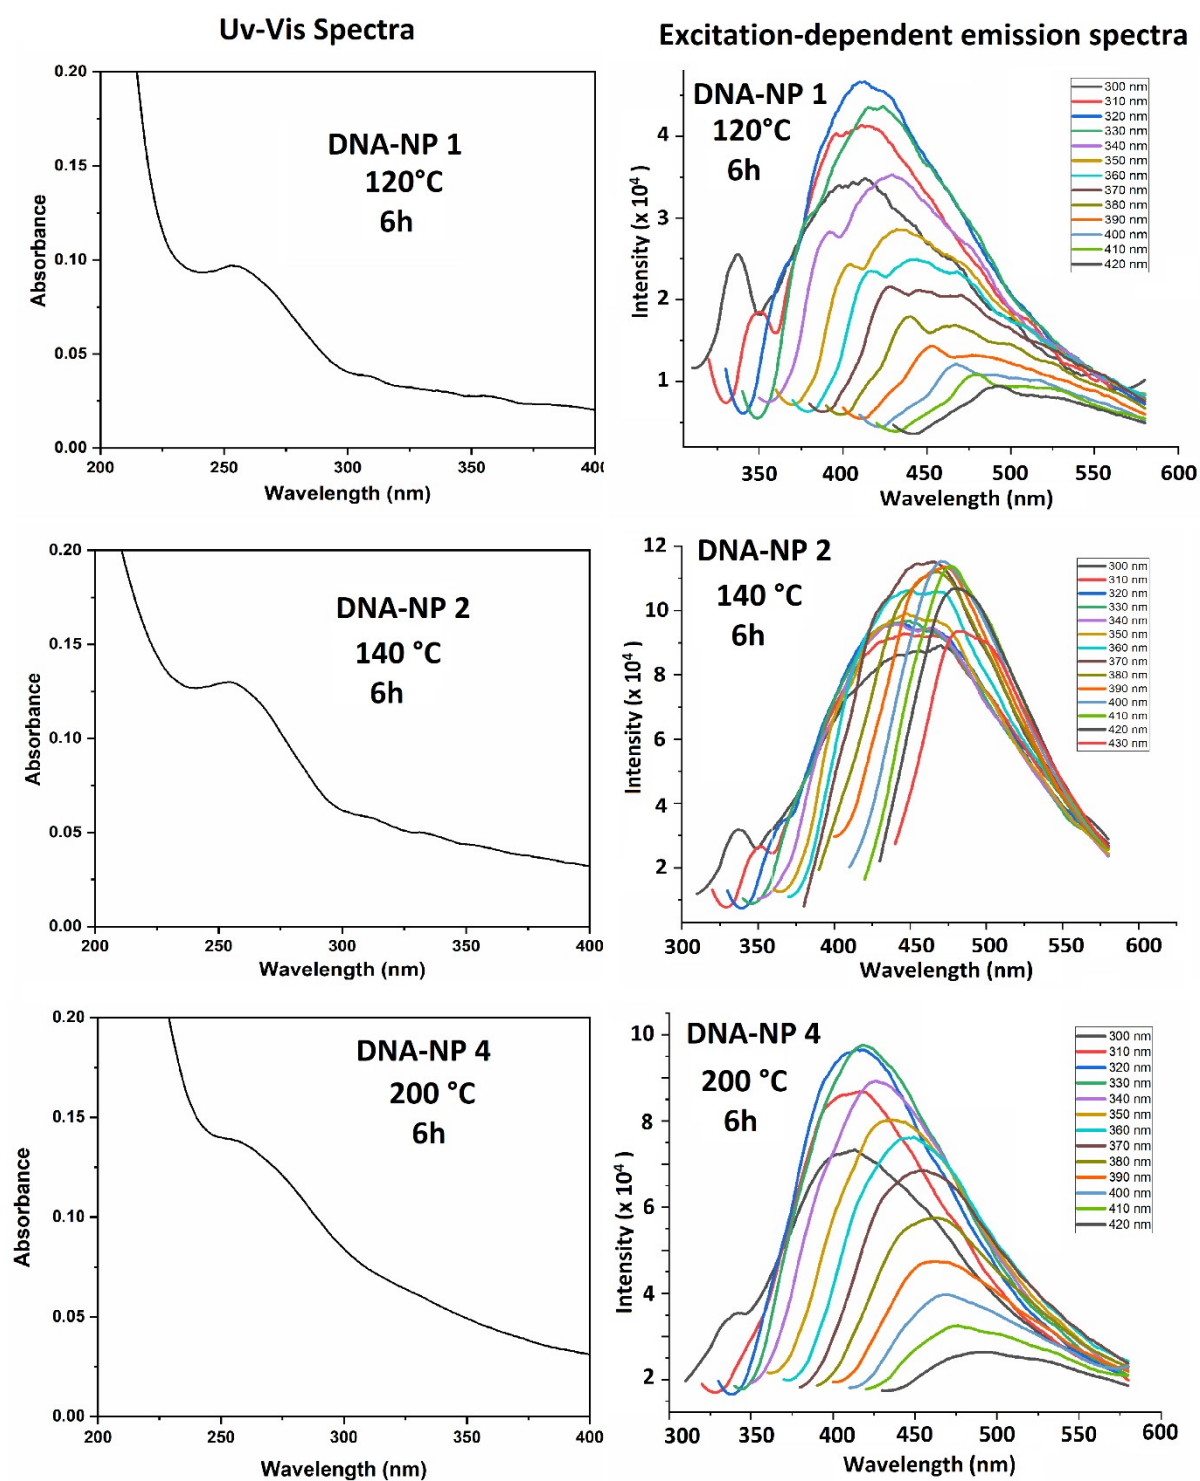

**Fig. S2: Excitation dependent emission spectra and UV-Vis Spectra of DNA-NPs synthesised at different conditions (DNA-NP 3 or DNA-NP, the optimized candidate not shown here, demonstrated in figure 2, main manuscript)**

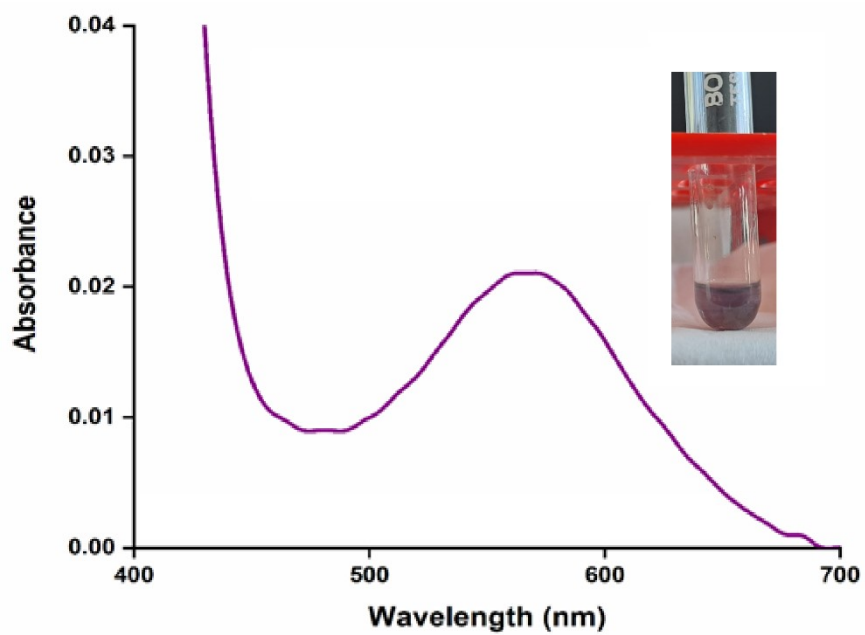

**Figure S3: Formation of Ruhemman's purple ( $\lambda_{\text{max}} = 570 \text{ nm}$ ) by DNA-NP**

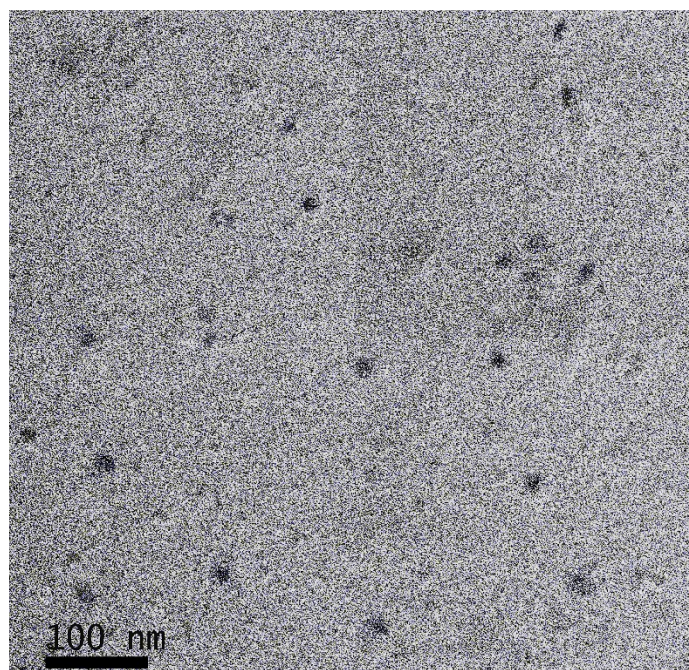

**Figure S4: TEM image of DNA NP at lower resolution**

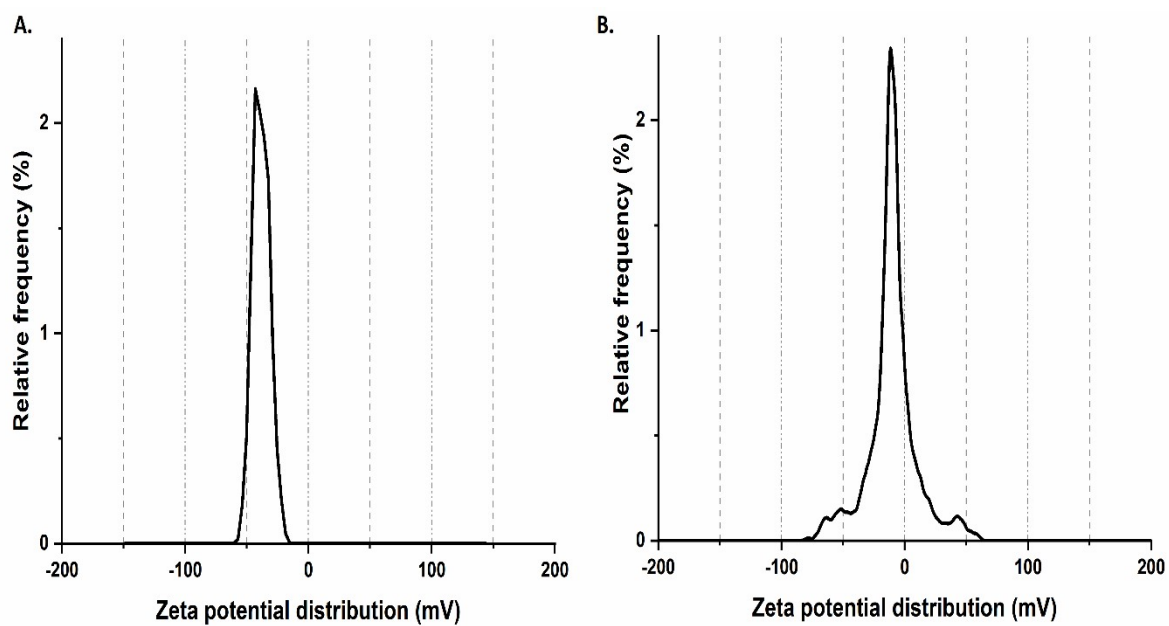

**Fig S5: Zeta potential of (A) DNA and (B) DNA-NP**

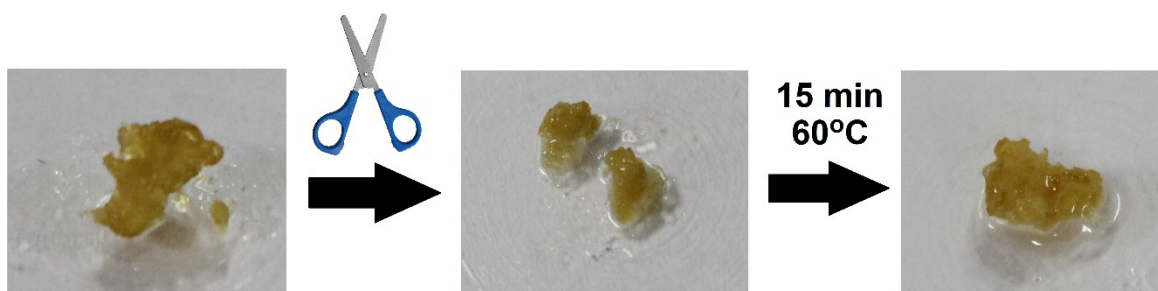

**Fig. S6: Demonstration of self-healing property of DNA-NP hydrogel**



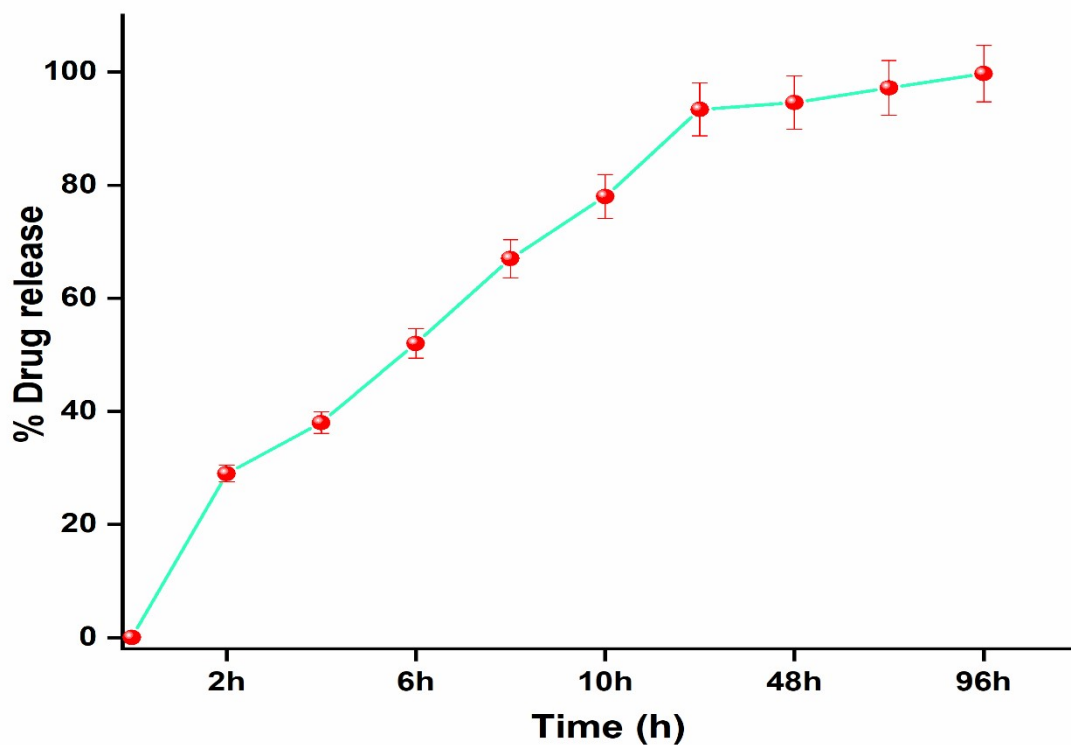

**Fig S7: Release profile of Amp from DNA-NP hydrogel at physiological conditions (37°C, pH~7.4)**

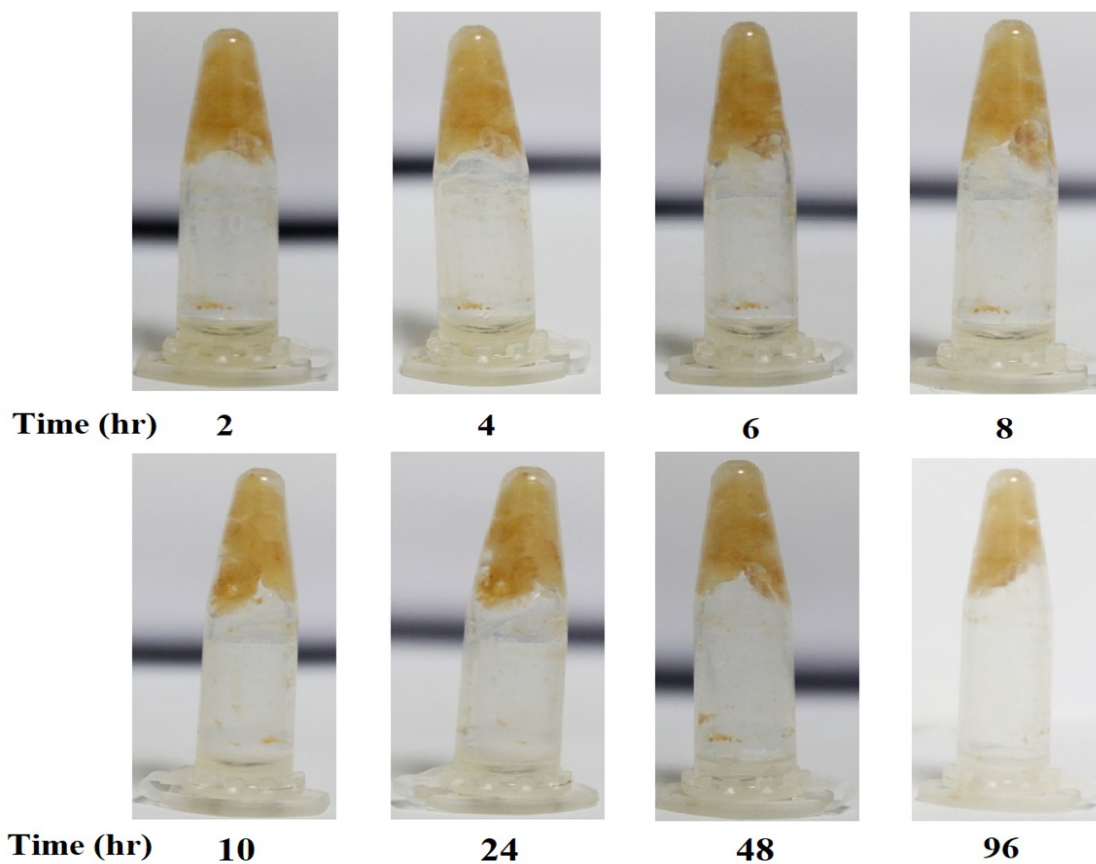

**Fig S8: Digital images of DNA-NP hydrogel during drug release taken at different time interval.**

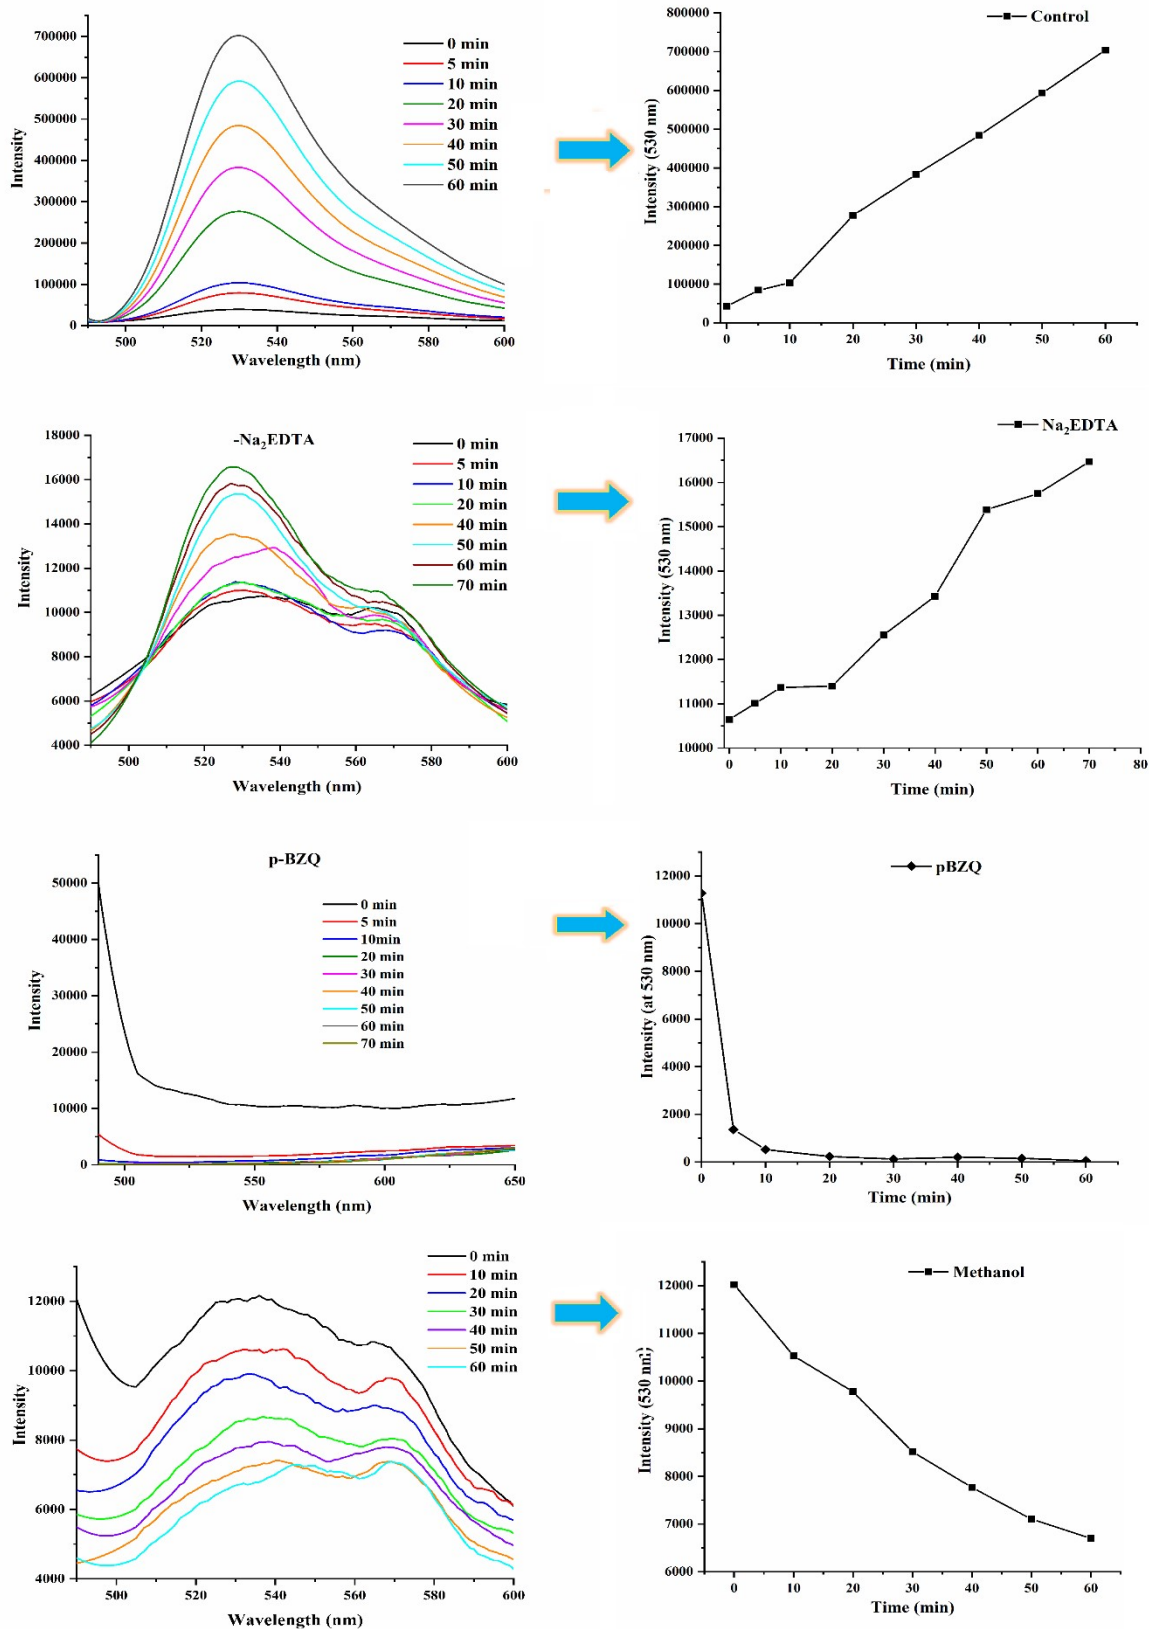

**Figure S9: ROS generation of DNA-NP hydrogel in presence of visible light by using various radical scavengers A. control, B. Na<sub>2</sub>EDTA, C. p-BZQ, D. Methanol.**

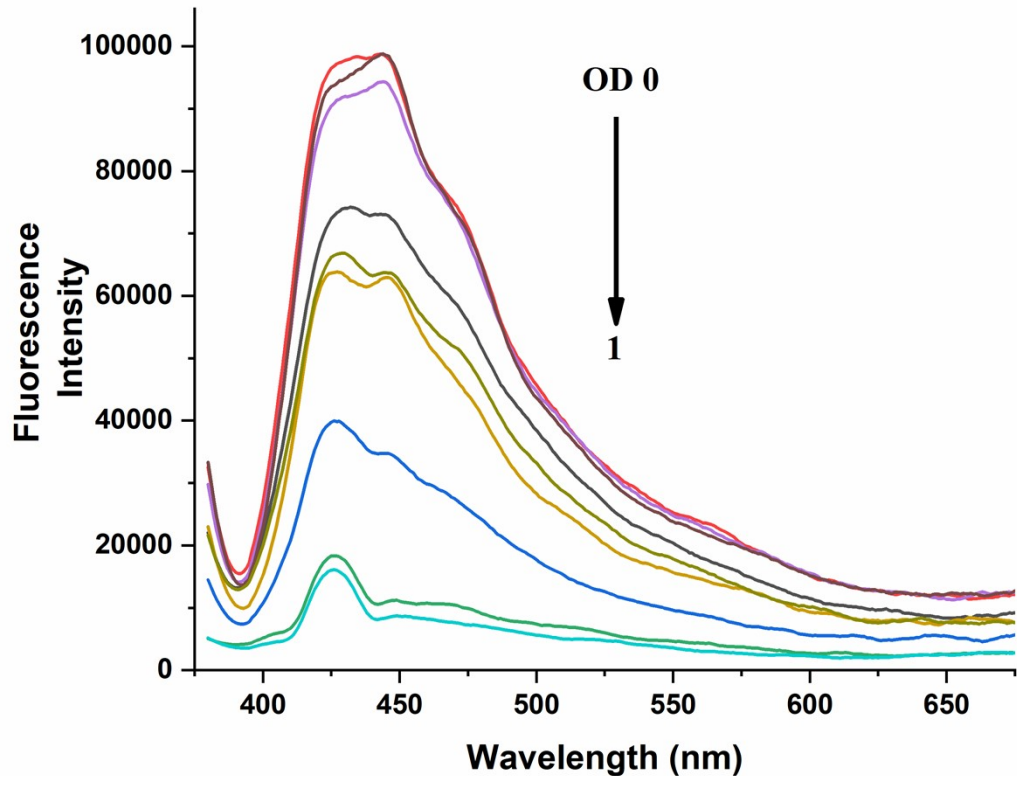

Figure S10: Decreasing fluorescence intensity with increasing absorbance (OD<sub>600</sub>) of culture media of *E. coli*



| <b>DNA-NP Abbreviation</b> | <b>Reaction Condition</b> | <b>Calculated Quantum yield (in %)</b> | <b>Excitation maximum (nm)</b> | <b>Emission maximum (nm)</b> |
|----------------------------|---------------------------|----------------------------------------|--------------------------------|------------------------------|
| <b>DNA-NP 1</b>            | 120°C                     | 0.2                                    | 320                            | 410                          |
| <b>DNA-NP 2</b>            | 140°C                     | 1.4                                    | 320                            | 428                          |
| <b>DNA-NP 3 (DNA-NP)</b>   | 160°C                     | <b>5.33</b>                            | 320                            | 432                          |
| <b>DNA-NP 4</b>            | 200°C                     | 2.32                                   | 320                            | 418                          |

**Table 1: Quantum yields and corresponding excitation and emission wavelengths of different synthesised DNA-NPs.**

| <b>Sample</b>                       | <b>Lifetime (ns)</b> |                      |                      | <b>T<sub>avg</sub> (ns)</b> | <b>a<sup>2</sup> (%)</b>  | <b>χ<sup>2</sup></b> |
|-------------------------------------|----------------------|----------------------|----------------------|-----------------------------|---------------------------|----------------------|
|                                     | <b>T<sub>1</sub></b> | <b>T<sub>2</sub></b> | <b>T<sub>3</sub></b> |                             |                           |                      |
| <b>DNA-NP 3 (DNA-NP) (160°C,6h)</b> | <b>0.08</b>          | <b>1.19</b>          | <b>5.90</b>          | <b>3.92</b>                 | <b>7.57, 32.60, 59.84</b> | <b>0.987</b>         |

**Table 2: Tri-exponential fitting of Fluorescence Lifetime of DNA-NP**
